# Supplementary material
Source: Springer Nature journal article supplement (https://www.springermedizin.de/resource/supplementary/12913_2013_3740_MOESM11_ESM.pdf/9532248)
Supplement: MOESM11 [file 9532248]

**Day\_2**

**a)**

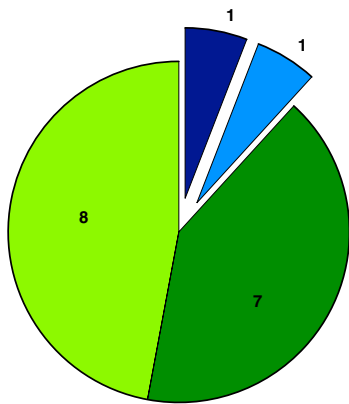

Total=17

**Day\_3**

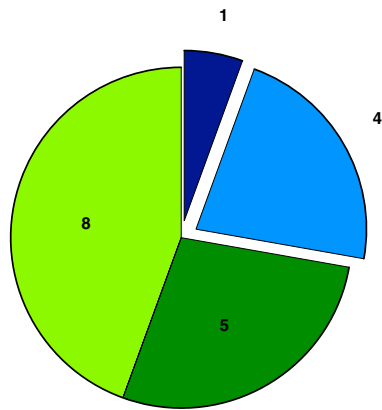

Total=18

**b)**

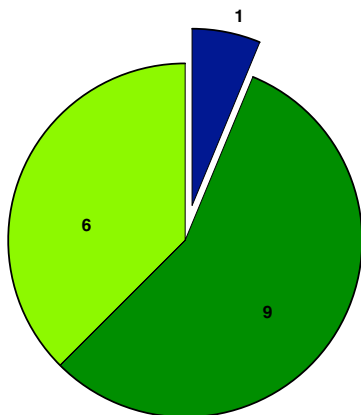

Total=16

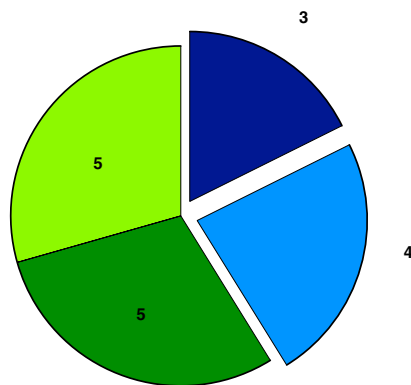

Total=17

 Not Discharged /  
AChE ordered

 Not Discharged /  
AChE not  
ordered

 Discharged /  
AChE  
ordered

 Discharged /  
AChE not  
ordered
